# Supplementary material for: Oxidative Modifications of Parkin Underlie its Selective Neuroprotection in Adult Human Brain
Source: bioRxiv or medRxiv preprint supplement (doi:10.1101/2020.02.19.953034), 2020-02-20
Supplement: Supplementary file [file media-1.pdf]

| ID in figures | Sample ID | Brain region       | Age | Sex | PMI (hrs) | Diagnosis | Parkin Solubility | H2O2/Tissue ratio |
|---------------|-----------|--------------------|-----|-----|-----------|-----------|-------------------|-------------------|
| a             | 1         | F ctx              | 5   | F   | 33        | HCO       | 1                 |                   |
| b             | 2         | F ctx              | 5   | F   | 20        | HCO       | 1                 | 2.551             |
|               | 3         | F ctx              | 8   | M   | 5         | HCO       | 0                 | 1.780             |
| t             | 4         | F ctx              | 13  | M   | 13        | HCO       | 1                 | 2.217             |
|               | 5         | F ctx              | 15  | F   | 9         | HCO       | 1                 | 1.349             |
| j             | 6         | F ctx              | 16  | F   | 20        | HCO       | 1                 |                   |
| c             | 7         | F ctx              | 16  | F   | 14        | HCO       | 1                 | 1.016             |
| ff            | 8         | F ctx              | 17  | M   | 23        | HCO       | 0                 | 0.701             |
|               | 9         | F ctx              | 17  | M   | 22        | HCO       | 1                 |                   |
| k             | 10        | F ctx              | 20  | F   | 19        | HCO       | 1                 |                   |
| o             | 11        | F ctx              | 20  | M   | 8         | HCO       | 1                 |                   |
|               | 12        | F ctx              | 20  | M   | 6         | HCO       | 0                 |                   |
|               | 13        | F ctx              | 20  | M   | 5         | HCO       | 1                 |                   |
|               | 14        | F ctx              | 21  | M   | 30        | HCO       | 1                 |                   |
|               | 15        | F ctx              | 28  | M   | 33        | NCO       | 1                 |                   |
| d             | 16        | F ctx              | 29  | F   | 18        | NCO       | 0                 | 3.061             |
|               | 17        | F ctx              | 30  | M   | 20        | HCO       | 0                 | 6.089             |
|               | 18        | F ctx              | 36  | M   | 20        | HCO       | 0                 | 5.665             |
| u             | 19        | F ctx              | 37  | F   | 13        | HCO       | 0                 |                   |
| v             | 20        | F ctx              | 38  | M   | 17        | HCO       | 0                 |                   |
|               | 21        | F ctx              | 39  | M   | 23        | HCO       | 1                 |                   |
| e             | 22        | F ctx              | 39  | M   | 14        | HCO       | 1                 |                   |
|               | 23        | F ctx              | 42  | M   | 18        | HCO       | 1                 |                   |
| f             | 24        | F ctx              | 43  | F   | 22        | HCO       | 0                 | 4.601             |
|               | 25        | F ctx              | 44  | F   | 21        | NCO       | 0                 |                   |
|               | 26        | F ctx              | 49  | F   | 16        | HCO       | 0                 | 5.622             |
| s             | 27        | F ctx              | 49  | F   | 14        | HCO       | 0                 |                   |
| m             | 28        | F ctx              | 54  | M   | 16        | NCO       | 0                 |                   |
|               | 29        | F ctx              | 54  | F   | 23        | NCO       | 1                 |                   |
| w             | 30        | F ctx              | 55  | F   | 16        | HCO       | 0                 | 5.829             |
| q             | 31        | F ctx              | 56  | M   | 23        | HCO       |                   |                   |
|               | 32        | F ctx              | 57  | M   |           | HCO       | 0                 |                   |
| g             | 33        | F ctx              | 62  | M   | 15        | NCO       | 0                 | 6.525             |
| x             | 34        | F ctx              | 65  | M   | 5         | PSM       | 0                 | 6.473             |
| z             | 35        | F ctx              | 65  | M   | 14        | PSM       | 0                 | 9.112             |
| n             | 36        | F ctx              | 65  | F   | 42        | HCO       | 0                 | 5.768             |
| h             | 37        | F ctx              | 66  | M   |           | HCO       | 0                 | 6.674             |
| p             | 38        | F ctx              | 68  | M   | 17        | HCO       | 0                 | 2.514             |
| i             | 39        | F ctx              | 70  | F   |           | HCO       | 0                 | 6.897             |
| r             | 40        | F ctx              | 70  | M   |           | HCO       | 0                 | 5.459             |
| aa            | 41        | F ctx              | 72  | M   |           | PSM       | 1                 | 6.274             |
|               | 42        | F ctx              | 75  | M   | 48        | HCO       | 1                 | 2.878             |
|               | 43        | F ctx              | 75  | F   | 13        | NCO       | 0                 |                   |
| y             | 44        | F ctx              | 75  | M   | 17        | PSM       | 0                 |                   |
|               | 45        | F ctx              | 76  | M   | 74        | PSM       | 0                 |                   |
| l             | 46        | F ctx              | 85  | F   | 15        | NCO       | 0                 |                   |
| bb            | 47        | Midbrain           | 26  | M   | 2         | NCO       | 0                 |                   |
|               | 25        | Midbrain           | 44  | F   | 21        | HCO       | 0                 |                   |
| ee            | 48        | Midbrain           | 44  | F   | 5         | NCO       | 1                 |                   |
|               | 49        | Midbrain           | 45  | M   | 13        | NCO       | 0                 |                   |
|               | 50        | Midbrain           | 47  | F   | 20        | NCO       | 0                 |                   |
|               | 51        | Midbrain           | 56  | M   | 44        | PSM       | 0                 |                   |
|               | 52        | Midbrain           | 60  | M   | 16        | PSM       | 0                 |                   |
|               | 53        | Midbrain           | 61  | M   | 20        | NCO       | 1                 |                   |
| cc            | 54        | Midbrain           | 61  | M   | 3.5       | NCO       | 0                 |                   |
| n             | 36        | Midbrain           | 65  | F   | 42        | HCO       | 0                 |                   |
| dd            | 55        | Midbrain           | 65  | M   | 6         | NCO       | 0                 |                   |
|               | 41        | Midbrain           | 72  | M   |           | PSM       | 1                 |                   |
|               | 56        | Midbrain           | 74  | F   |           | NCO       | 0                 |                   |
|               | 42        | Midbrain           | 75  | M   | 48        | HCO       | 0                 |                   |
|               | 57        | Midbrain           | 75  | M   | 70        | PSM       | 0                 |                   |
|               | 45        | Midbrain           | 76  | M   | 74        | PSM       | 0                 |                   |
|               | 58        | Midbrain           | 79  | M   |           | PSM       | 0                 |                   |
|               | 59        | Midbrain           | 82  | M   | 48        | PSM       | 1                 |                   |
| SC-1          | 60        | Spinal cord/muscle | 68  | F   | 2.5       | NCO       | 1                 |                   |
| SC-2          | 61        | Spinal cord/muscle | 64  | F   | 2         | HCO       | 1                 |                   |
| SC-3          | 62        | Spinal cord/muscle | 71  |     | 2         |           | 1                 |                   |
| SC-4          | 63        | Spinal cord/muscle | 50  | M   | 4         |           | 1                 |                   |

**Supplementary Table 1:** Summary of human brain tissue specimens used in this study with designated small letter identification, as used in the Figures. Abbreviations used: F ctx, frontal cortex; PMI, *post mortem* interval; hrs, hours; HCO, healthy control; NCO, neurological control; PSM, parkinsonism, n.d., not documented. For parkin solubility: 1, present in Tris-saline (TS) buffer; 0, not present in TS.

|           |                   | r-parkin |     |                               |      |       |       |       |
|-----------|-------------------|----------|-----|-------------------------------|------|-------|-------|-------|
| Treatment |                   | Control  |     | H <sub>2</sub> O <sub>2</sub> |      |       |       |       |
| Run       |                   | IAA+NEM  | IAA | 20μM                          | 1mM  | 4.5mM | 4.5mM | 4.5mM |
| Labelling |                   |          |     | *IAA                          | +NEM |       |       |       |
| Region    | Cysteine Residues |          |     |                               |      |       |       |       |
| UBL       | 59                |          | •   | n/d                           | •    | • +   | •     | •     |
| Linker    | 95                | •        | •   | •                             | •    | • +   | • +   | • +   |
| RING0     | 150               | •        | •   | •                             | •    | • +   | • +   | •     |
|           | 154               | •        | •   | n/d                           | •    | • +   | • +   | •     |
|           | 166               | n/d      | n/d | •                             | • +  | n/d   | •     | •     |
|           | 169               | n/d      | •   | •                             | • +  | n/d   | •     | •     |
|           | 182               | •        | •   | •                             | n/d  | • +   | • +   | •     |
|           | 196               | •        | •   | •                             | •    | • +   | • +   | • +   |
|           | 201               | •        | •   | •                             | •    | • +   | • +   | • +   |
|           | 212               | •        | •   | •                             | n/d  | • +   | • +   | • +   |
| RING1     | 238               | •        | •   | • +                           | •    | • +   | •     | • +   |
|           | 241               | •        | •   | • +                           | •    | • +   | •     | •     |
|           | 253               | •        | •   | • +                           | •    | • +   | •     | •     |
|           | 260               | •        | •   | n/d                           | n/d  | • +   | •     | •     |
|           | 263               | •        | •   | n/d                           | n/d  | • +   | •     | •     |
|           | 268               | •        | •   | n/d                           | n/d  | • +   | •     | •     |
|           | 289               | •        | •   | n/d                           | n/d  | • +   | • +   | • +   |
|           | 293               | •        | •   | n/d                           | •    | •     | • +   | • +   |
| IBR       | 323               | •        | •   | n/d                           | n/d  | • +   | • +   | • +   |
|           | 332               | •        | •   | n/d                           | n/d  | • +   | •     | •     |
|           | 337               | •        | •   | n/d                           | •    | • +   | •     | • +   |
|           | 352               | •        | •   | •                             | •    | •     | • +   | • +   |
|           | 360               | •        | •   | •                             | •    | • +   | •     | •     |
|           | 365               | •        | •   | •                             | n/d  | • +   | •     | •     |
|           | 368               | •        | •   | n/d                           | n/d  | • +   | • +   | •     |
| RING2     | 377               | •        | •   | •                             | n/d  | • +   | • +   | • +   |
|           | 418               | n/d      | n/d | n/d                           | •    | n/d   | n/d   | n/d   |
|           | 421               | n/d      | n/d | n/d                           | • +  | n/d   | • +   | • +   |
|           | 431               | n/d      | •   | n/d                           | •    | n/d   | •     | •     |
|           | 436               | n/d      | n/d | n/d                           | • +  | n/d   | •     | •     |
|           | 441               | n/d      | n/d | n/d                           | • +  | n/d   | •     | •     |
|           | 446               | •        | •   | n/d                           | n/d  | • +   | • +   | • +   |
|           | 449               | •        | •   | n/d                           | n/d  | • +   | • +   | •     |
| 451       | •                 | •        | n/d | n/d                           | • +  | •     | •     |       |
|           | 457               | •        | •   | •                             | •    | • +   | •     | • +   |

### Supplementary Table 2: Parkin's cysteine residues are redox active.

Aliquots of human recombinant (r-) parkin that were oxidized by variable concentrations of H<sub>2</sub>O<sub>2</sub> vs. control preparations were differentially labelled with iodoacetamide (IAA) and/or N-ethylmaleimide (NEM); as in Figure 4A) to identify reduced cysteines (IAA) or reversibly-oxidized residues (NEM). Proteins were subjected to LC-MS/MS and analyzed using Mascot Scaffold PTM to identify IAA (•) or NEM (+) adducts indicating when these were detectable on individual residues. Cysteines that were not detected as modified in individual runs are also listed (n/d). Note that cysteines within all four RING domains of parkin as well as in the linker and UBL domains can be variably modified. Corresponding data can be found in Extended Data Fig. 4h. For comparison, see **Extended Data Table 1** that lists modified cysteines identified in parkin purified from human brain.
